# Supplementary material
Source: publisher figshare collection journal article supplement (https://tandf.figshare.com/ndownloader/files/22448861)
Supplement: Supplementary file 1 [file 22448861]

**Table S1.** Location of the samples studied in this work. These materials are on deposit in the Herbarium of the University of Almería (HUAL).

| Species | Location | HUAL reference number |
| --- | --- | --- |
| *Quercus coccifera* L. | Jaén: Virgen de la Cabeza, 30S 408324 4225902, 562 m  Jaén: Marmolejo, 30S 395909 4218529, 385 m  Jaén: Lugar Nuevo, 30S 409032 4224170, 363 m  Jaén: Andújar, 30S 397587 4227352, 342 m  Córdoba: Aldea Cerezo, 30S 391180 4234230, 627 m | 26168  26160  26167  26181  26163 |
|  |  |  |
| *Q. faginea* Lam. subsp. *faginea* | Jaén: El Centenillo, 30S 433944 4246510, 757 m  Ciudad Real: Solana del Pino, 30S 406548 4252421, 878 m  Córdoba: Vegueta del Fresno, 30S 392091 4233593, 502 m  Jaén: Aldeaquemada, 30S 456696 4249042, 854 m  Ciudad Real: Fuencaliente, 30S 389981 4251407, 654 m | 26173  26175  26164  26172  26179 |
|  |  |  |
| *Q. pyrenaica* Willd. | Jaén: Sierra Estrella, 30S 446777 4248919, 1075 m  Jaén: Sierra Quintana, 30S 392587 4250021, 904 m  Ciudad Real: Fuencaliente, 30S 389501 4253103, 938 m  Córdoba: Venta del Charco, 30S 388162 4226886,734 m  Córdoba: Cardeña, 30S 386603 4231639, 741 m | 26174  26184  26180  26161  26162 |
|  |  |  |
| *Q. rotundifolia* Lam. | Jaén: Miranda del Rey, 30S 448191 4246150, 757 m  Córdoba: Azuel, 30S 384635 4244112, 600 m  Jaén: La Aliseda, 30S 449726 4242507, 686 m  Jaén: El Encinarejo, 30S 412227 4224358, 293 m  Jaén: Andújar, 30S 404971 4246051, 710 m | 26182  26165  26171  26166  26176 |
|  |  |  |
| *Q. suber* L. | Jaén: La Carolina, 30S 447577 4243212, 709 m  Córdoba: Los Patalos, 30S 388919 4223869, 627 m  Jaén: Andújar, 30S 414155 4220523, 531 m  Córdoba: Los Rasos, 30S 388080 4221334, 596 m  Jaén: Sierra Quintana, 30S 397648 4248081, 730 m | 26183  26178  26169  26177  26170 |
